# Supplementary material
Source: publisher figshare collection journal article supplement (https://gsapubs.figshare.com/ndownloader/files/31675448)
Supplement: Supplementary file 1 [file 31675448]

## Sheet: Table S4
Table DR4 Zircon Rare Earth Element Compositions
Sample ID	U-Pb date	2σ error	Ti	Y	Nb	La	Ce	Pr	Nd	Sm	Eu	Gd	Tb	Dy	Ho	Er	Tm	Yb	Lu	Hf	U	Th	∑REE	∑LREE (La-Sm)	∑HREE (Gd-Lu)	LaN/SmN	GdN/YbN	Eu/Eu*	Ce/Ce*	log (Ti, ppm)	T (K)	T (°C)
Beavers Bend-3	325.798	4.4067	5.44	1350	5.73	0.353	14.39	0.61	5.16	6.48	0.713	16.38	8.01	109.2	40.8	202	45.6	484	69.3	8610	468	360	9687.69	26.993	982.483	0.0212435	0.0221521	0.643048	4.66488	0.735599	963.143	689.993
Beavers Bend-9	327.257	3.52372	5.56	1230	3.28	1.06	10.9	1.02	7.2	6.4	0.87	16.3	7.55	96.5	34.7	175	37.5	376	60.1	7680	222	190	8569.85	26.58	810.92	0.0645881	0.0283756	0.791468	1.5769	0.745075	964.876	691.726
Beavers Bend-10	328.101	5.10096	4.99	2000	2.71	0.17	5.66	0.37	5.9	11.2	1.75	35.7	15.9	198	65	281	60	650	77	5890	203	155	7355.69	23.3	1395.55	0.00591913	0.0359501	0.813192	3.39487	0.698101	956.343	683.193
Beavers Bend-17	329.747	4.27597	5.38	1220	3.5	0.169	11	0.418	2.72	5.46	0.705	15.4	8.3	114.6	35.74	196	48.4	472	60.2	9110	256.9	168	10167.6	19.767	956.805	0.0120704	0.0213562	0.714382	6.22577	0.730782	962.264	689.114
Beavers Bend-19	326.269	3.48687	5.71	2570	4.2	4.8	45.8	8.8	62.1	40.9	10.6	82	27.8	282	75	306	57	536	80.2	6900	273	500	8532.11	162.4	1497.5	0.0457662	0.100137	1.70073	1.06007	0.756636	966.999	693.849
Beavers Bend-24	328.306	4.71775	6.16	1810	4.81	0.98	18	1.7	13.8	11.7	1.57	27.1	11.9	159	56	270	58.6	584	90.5	8600	367	344	9954.76	46.18	1270.37	0.0326638	0.030374	0.819257	2.09781	0.789581	973.102	699.952
Beavers Bend-30	328.206	3.73053	5.17	2320	7.4	2.25	28.5	2.64	19.5	15.3	2.02	36	16.5	214	74.9	349	75.6	828	106	7460	699	629	9284.33	68.19	1717.32	0.0573479	0.0284589	0.799747	1.75907	0.713491	959.122	685.972
Beavers Bend-32	328.82	6.19715	5.11	967	3.43	0.49	9.23	0.147	1.5	3.38	0.329	9.48	5.15	78.2	30.7	162	39.8	463	67.5	8990	336	117	9997.89	14.747	859.539	0.0565335	0.0134021	0.540047	5.17341	0.708421	958.205	685.055
Beavers Bend-39	328.633	3.85947	5.06	1369	2.3	0.19	9.7	0.15	2.25	5.6	0.64	18.7	9	115	43.5	208.4	44.7	512	69.4	7350	267	168	8480.66	17.89	1026.94	0.013231	0.0239066	0.581116	8.64333	0.704151	957.434	684.284
Beavers Bend-49	325.326	4.7867	5.21	2940	3.13	6.3	22.4	2.26	17.1	18.2	2.95	52.4	23.3	277	95	433	88	898	128	6000	336	269	8113.25	66.26	2015.85	0.134988	0.0381945	0.887603	0.893008	0.716838	959.729	686.579
Beavers Bend-55	325.613	3.48345	5.25	2020	3.85	0.32	16	0.38	4.49	8.6	0.829	25.3	12.9	169	60	311	68	700	102	8860	399	357	10420.2	29.79	1457.63	0.0145104	0.0236575	0.522207	6.90216	0.720159	960.331	687.181
Beavers Bend-80	328.18	4.61446	5.1	1051	4.38	0.127	14.07	0.113	1.62	4.29	0.554	11.96	6.39	87.8	32.1	162	37.5	395	56.5	8140	323	288	9042.1	20.22	794.094	0.0115444	0.0198189	0.718644	17.6679	0.70757	958.051	684.901
Beavers Bend-94	327.856	4.72516	5.5	818	3.49	0.0064	7.99	0.0307	0.833	3.38	0.338	8.85	4.73	67	24.49	127.4	29.8	315	45.8	8590	242.2	128.5	9318.84	12.2401	626.788	0.000738397	0.0183899	0.574228	85.7471	0.740363	964.013	690.863
Hatton-1	328.903	5.95818	5.24	1560	3.96	8.3	31.1	3.3	20	15.5	3.2	33	13.6	157	50	229	48	480	69	8180	228	281	9371.97	78.2	1098.3	0.208821	0.0450006	1.3147	0.893915	0.719331	960.181	687.031
Hatton-32	327.976	4.16074	5.54	1620	3.69	0.88	11.7	0.76	6.2	10	1.65	25	11.7	133	49.1	241	46.9	491	75.4	8500	316	180	9653.39	29.54	1084.75	0.034317	0.0333276	0.969643	2.15213	0.74351	964.589	691.439
Hatton-76	325.038	3.50206	5.24	1030	2.78	0.35	8.4	0.46	5.6	7.3	1.59	19.2	8.2	102	39.7	166	37.8	488	56.5	7110	266.3	137	8117.95	22.11	926.29	0.018697	0.025753	1.24791	3.14918	0.719331	960.181	687.031
Hatton-79	326.047	3.54982	4.87	1150	4.11	0.108	8.15	0.192	2.29	5.03	0.71	14.34	7.33	98.5	35.7	179	39.8	417	61.2	7630	286	182	8582.25	15.77	858.61	0.00837303	0.0225091	0.77678	8.51386	0.687529	954.444	681.294
Lower Mud Creek-9	324.975	4.05292	4.76	730	1.78	0.026	3.7	0.034	0.81	2.97	0.258	8	4.22	57.7	21.7	111	24.3	259	39.8	8700	74.5	40	9320.72	7.54	528.948	0.00341384	0.0202179	0.491807	18.7201	0.677607	952.668	679.518
Lower Mud Creek-14	329.53	5.16817	5.17	1350	3.02	0.112	10.87	0.197	3.31	6.95	1.3	19.4	9.2	127	43.7	208	47.4	486	66.8	8740	215	199	9840.17	21.439	1015.75	0.00628434	0.0261283	1.04027	11.0083	0.713491	959.122	685.972
Lower Mud Creek-18	324.976	3.42298	5.07	1090	4	0.329	13.83	0.334	2.98	5.6	1.52	14.36	7.3	112	38.2	177	45	518	57.8	8500	279	167	9586.75	23.073	976.78	0.0229105	0.0181456	1.57496	6.276	0.705008	957.589	684.439
Lower Mud Creek-21	327.672	4.31711	4.78	1900	5.24	1.04	19.9	0.52	4.5	7.52	0.568	25.2	12.6	172	61	297	64.4	652	92.4	8720	379	465	10217.4	33.48	1384.69	0.0539315	0.0252987	0.383387	4.07067	0.679428	952.993	679.843
Lower Mud Creek-30	326.025	4.37595	4.73	1600	3.79	1.11	24.1	1.22	10.7	12.8	4.8	30.9	13.2	164	56	245	54.6	617	71	8200	317	277	9554.63	49.93	1269.3	0.0338174	0.0327808	2.24262	3.11535	0.674861	952.178	679.028
Lower Mud Creek-32	328.809	4.68908	4.82	1240	2.55	0.77	9.1	0.19	1.93	4.55	0.476	14.5	7.73	112	40.2	197	46.7	516	65.9	8840	165	103	9970.45	16.54	1005.06	0.0659942	0.0183935	0.544522	3.57891	0.683047	953.641	680.491
Lower Mud Creek-59	326.723	4.44858	4.85	1450	2.88	0.66	11.47	0.255	2.67	5.5	0.96	16.9	8.6	121	45	226	51.9	550	80.2	8170	303	171	9391.11	20.555	1106.06	0.0467959	0.0201127	0.925219	4.20584	0.685742	954.124	680.974
Lower Mud Creek-66	327.9	4.13654	4.92	1100	3.58	0.353	11.8	0.33	3.09	5.1	1.39	14	7.18	99	35.23	175	39	410	58.5	9300	225	146	10240.4	20.673	844.4	0.0269918	0.0223506	1.52849	5.20079	0.691965	955.24	682.09
Lower Mud Creek-69	326.068	7.46802	5.56	1310	3.34	0.51	14.54	0.537	4.8	6.45	2.42	16.4	8	105	37.4	196	43.5	439	71	9700	285	187	10713.6	26.837	925.17	0.0308345	0.0244526	2.18631	4.17949	0.745075	964.876	691.726
Lower Mud Creek-86	326.233	4.44952	5.58	2040	2.85	3.59	20.7	1.53	9.9	9.38	2.29	27.14	13.41	178	62.6	311	64.4	627	100	10580	214.3	183	12077.8	45.1	1395.22	0.149251	0.0283327	1.3336	1.32865	0.746634	965.162	692.012
Lower Mud Creek-92	325.235	8.69364	5.51	1330	3.21	0.17	9.4	0.238	2.74	5.58	0.84	16.1	8.4	113	39.9	206	48.4	485	67	10690	161	112	11779.7	18.128	990.22	0.0118807	0.0217285	0.823469	7.02986	0.741152	964.158	691.008
Lower Mud Creek-93	324.853	5.56385	5	1480	2.78	0.313	14.7	0.4	4	6.9	1.74	20.8	10.7	151	48	240	58	614	67	8400	262.9	197	9726.54	26.313	1218.14	0.0176898	0.0221738	1.34956	6.24952	0.69897	956.5	683.35
Chickasaw-11	325.45	3.79976	5.38	1565	3.23	0.22	17.4	0.329	4.68	8.25	1.282	24.1	11.35	141.3	49.6	247	55	585	86.4	9290	361	277	10592.8	30.879	1209.28	0.0103991	0.0269654	0.844793	9.72908	0.730782	962.264	689.114
Chickasaw-22	329.885	6.18953	5.31	946	3.63	0.43	20.1	0.6	5.1	6.4	1.42	14.8	6.41	87.3	31.8	158	37.9	402	57.2	9960	338	209	10852.3	32.63	803.23	0.0262008	0.024098	1.35571	5.95275	0.725095	961.228	688.078
Chickasaw-37	328.002	3.2428	4.97	2680	5.49	0.54	26	0.611	8.16	15.7	2.85	49.9	22.1	273	92.8	434	91.9	948	131	7920	715	675	10076.9	51.011	2061.25	0.0134128	0.0344539	0.946112	6.80907	0.696356	956.029	682.879
Barnett-79	323.105	7.4534	5.2	1313	4.14	0.115	22.7	0.22	2.29	4.07	1.53	13.11	6.65	91.1	35.1	194	46	491	88.9	8420	488	730	9537.42	29.395	971.46	0.0110187	0.017477	1.94622	21.4683	0.716003	959.577	686.427
Barnett-91	324.832	4.27671	5.36	1520	4.1	0.33	14.59	0.242	3.35	6.54	2.09	21.2	9.96	131	48	245	55.2	616	98.2	9600	467	830	10945.9	25.052	1233.19	0.0196772	0.0225269	1.64925	7.76644	0.729165	961.969	688.819
Barnett-95	325.12	4.97825	5.07	1170	4	0.106	19.5	0.119	1.59	3.16	1.23	11.2	6	82	32.4	190	45.3	507	97	9400	483	470	10557	24.475	975.29	0.0130811	0.0144596	1.9211	26.118	0.705008	957.589	684.439
Barnett-96	325.12	3.89947	5.51	1110	3.62	0.05	16.6	0.235	3.1	5	2.23	13.5	6.2	92	30	170	42.2	439	75	10460	347	1640	11442.9	24.985	875.13	0.00389966	0.0201287	2.52203	23.0367	0.741152	964.158	691.008
Barnett-99	325.574	4.52016	4.87	800	2.64	0.104	15.8	0.068	1.28	2.26	1.53	7.8	4	54	21	113	26.8	326	66	8840	209	334	9623.89	19.512	622.39	0.0179453	0.0156611	3.38601	28.263	0.687529	954.444	681.294
Barnett-101	325.697	4.74168	4.99	980	3.49	0.056	17	0.092	1.87	3.22	1.03	11.09	5.64	78.4	28.9	161	39.3	442	74.6	9450	352	430	10451.5	22.238	845.18	0.00678202	0.0164231	1.60155	35.6281	0.698101	956.343	683.193
Barnett-105	325.965	2.94855	5.46	1419	5.44	0.058	25.9	0.44	5.35	7.61	3.25	18.4	9.41	120.9	42.1	212	47.9	501	77.2	11290	452	459	12427.4	39.358	1039.77	0.00297215	0.0240395	2.552	24.3888	0.737193	963.434	690.284
Barnett-111	326.439	3.55618	5.89	1041	3.81	0.16	16	0.219	2.72	5	2.15	13.4	5.9	72.9	28.8	160	38.2	463	86.9	10040	404	1280	11027.9	24.099	876.25	0.0124789	0.0189439	2.44061	12.8579	0.770115	969.487	696.337
Barnett-112	326.625	4.479	5.17	1329	3.75	6.8	35.2	1.75	9.7	6.68	1.39	18.9	8.59	114.1	41.6	216	52.2	607	93.8	9600	426	424	10904.6	60.13	1160.26	0.396971	0.0203807	1.14946	1.53497	0.713491	959.122	685.972
Barnett-120	328.457	3.1779	5.03	777	4.39	0.047	18.8	0.049	0.92	1.91	0.437	7.36	4.03	56.4	22.28	130.4	34.3	424	66.2	10000	379	256	10989.1	21.726	747.317	0.00959602	0.0113621	1.08299	58.9308	0.701568	956.968	683.818
Barnett-125	329.383	4.07719	5.17	718	3.1	0.05	13.14	0.101	1.69	2.88	1.08	8.7	4.18	61.1	21.3	113.4	28.9	322	51.8	9610	280	890	10352.1	17.861	615.34	0.00677024	0.0176852	2.00478	27.8151	0.713491	959.122	685.972
Barnett-160	336.595	4.43068	5.21	944	3.06	1.94	17.1	0.54	3.46	2.95	0.63	10.07	5.29	72	28.2	157	38.1	418	72.2	10100	241	190	11069.2	25.99	804.44	0.256452	0.0157688	1.07402	2.51322	0.716838	959.729	686.579
